# Supplementary material for: Surface ligands influence the selectivity of cation uptake in polyoxovanadate–alkoxide clusters
Source: Royal Society of Chemistry journal article supplement (doi:10.1039/d2ta01131j), 2022-01-01
Supplement: d2ta01131j1.pdf [file d2ta01131j1.pdf]

## Electronic Supporting Information (ESI)

# Surface Ligands Influence the Selectivity of Cation Uptake in Polyoxovanadate-alkoxide Clusters

Rachel E. Garwick<sup>‡a</sup>, Eric Schreiber<sup>‡a</sup>, William W. Brennessel<sup>a</sup>, James R. McKone<sup>\*b</sup>,  
Ellen M. Matson<sup>\*a</sup>

<sup>a</sup>Department of Chemistry, University of Rochester, Rochester NY 14527, USA

<sup>b</sup>Department of Chemical and Petroleum Engineering, University of Pittsburgh, Pittsburgh, PA 15260, USA

\*Corresponding Authors emails ellen.matson@rochester.edu (E. M. Matson); jmckone@pitt.edu (J.R. McKone)

<sup>‡</sup>Authors contributed equally to this work.

## Supporting Information Table of contents.

|                                                                                                                                                                                                                                                                                                  |      |
|--------------------------------------------------------------------------------------------------------------------------------------------------------------------------------------------------------------------------------------------------------------------------------------------------|------|
| <b>Experimental Methods</b> .....                                                                                                                                                                                                                                                                | S2-3 |
| <b>Figure S1.</b> <sup>1</sup> H NMR of <b>2-propyl</b> in MeCN-d <sub>3</sub> at 21°C.....                                                                                                                                                                                                      | S4   |
| <b>Figure S2.</b> CV of a 0.5 mM solution of <b>2-propyl</b> at 100 mVs <sup>-1</sup> in MeCN with 0.1 M [ <sup>n</sup> Bu <sub>4</sub> N]OTf electrolyte.....                                                                                                                                   | S4   |
| <b>Figure S3.</b> <sup>1</sup> H NMR of [ <sup>n</sup> Bu <sub>4</sub> N] <sub>2</sub> [V <sub>6</sub> O <sub>7</sub> (OC <sub>3</sub> H <sub>7</sub> ) <sub>12</sub> ] in MeCN-d <sub>3</sub> at 21°C.....                                                                                      | S5   |
| <b>Figure S4.</b> CV of a 1 mM solution of [ <sup>n</sup> Bu <sub>4</sub> N] <sub>2</sub> [V <sub>6</sub> O <sub>7</sub> (OC <sub>3</sub> H <sub>7</sub> ) <sub>12</sub> ] at 100 mVs <sup>-1</sup> in MeCN with 0.1 M [ <sup>n</sup> Bu <sub>4</sub> N]OTf electrolyte.....                     | S5   |
| <b>Figure S5.</b> <sup>1</sup> H NMR of [ <sup>n</sup> Bu <sub>4</sub> N] <sub>2</sub> [V <sub>6</sub> O <sub>7</sub> (OC <sub>5</sub> H <sub>11</sub> ) <sub>12</sub> ] in MeCN-d <sub>3</sub> at 21°C.....                                                                                     | S6   |
| <b>Figure S6.</b> CV of a 1 mM solution of [ <sup>n</sup> Bu <sub>4</sub> N] <sub>2</sub> [V <sub>6</sub> O <sub>7</sub> (OC <sub>5</sub> H <sub>11</sub> ) <sub>12</sub> ] at 100 mVs <sup>-1</sup> in MeCN with 0.1 M [ <sup>n</sup> Bu <sub>4</sub> N]OTf electrolyte.....                    | S6   |
| <b>Figure S7.</b> CV and SWV data for a) NaOTf and b) KOTf titration experiments for <b>2-propyl</b> in MeCN with 0.1 M [ <sup>n</sup> Bu <sub>4</sub> N]OTf electrolyte.....                                                                                                                    | S7   |
| <b>Figure S8.</b> CV and SWV data for a) NaOTf and b) KOTf titration experiments for <b>3-pentyl</b> in MeCN with 0.1 M [ <sup>n</sup> Bu <sub>4</sub> N]OTf electrolyte.....                                                                                                                    | S8   |
| <b>Figure S9.</b> CV and SWV data for LiOTf titration experiments for <b>1-methyl</b> and <b>2-propyl</b> in propylene carbonate with 0.1 M [ <sup>n</sup> Bu <sub>4</sub> N]OTf electrolyte.....                                                                                                | S9   |
| <b>Table S1.</b> Crystallographic parameters for [ <sup>n</sup> Bu <sub>4</sub> N] <sub>2</sub> [V <sub>6</sub> O <sub>7</sub> (OC <sub>3</sub> H <sub>7</sub> ) <sub>12</sub> ] and [Li(pc)] <sub>2</sub> [V <sub>6</sub> O <sub>7</sub> (OC <sub>3</sub> H <sub>7</sub> ) <sub>12</sub> ]..... | S10  |
| <b>References</b> .....                                                                                                                                                                                                                                                                          | S10  |

## Experimental Methods

**General Considerations.** All manipulations, unless otherwise noted, were carried out in the absence of water and oxygen in a UniLab MBraun inert atmosphere glovebox under a nitrogen atmosphere. Glassware was oven-dried for a minimum of 4 h and cooled in an evacuated antechamber prior to use. 3 Å molecular sieves (Fisher Scientific) were dried in a Schlenk flask for 48 h at 125 °C under vacuum prior to use. Acetonitrile (MeCN) was dried and deoxygenated on a Glass Contour System (Pure Process Technology, LLC) and stored over 3 Å molecular sieves. Tetrabutylammonium triflate ( $[\text{nBu}_4\text{N}]\text{OTf}$ ) was purchased from Millipore Sigma, recrystallized three times by addition of pentane to a solution of the salt in ethyl acetate, and stored under dynamic vacuum for at least 24 h prior to use. Tetrabutylammonium borohydride, lithium triflate (LiOTf), sodium triflate (NaOTf), potassium triflate (KOTf), and lithium bis-(trifluoromethanesulfonyl)imide were purchased from Millipore Sigma and used as is. Complexes  $[\text{V}_6\text{O}_7(\text{OCH}_3)_{12}]$ ,<sup>1</sup>  $[\text{V}_6\text{O}_7(\text{OC}_3\text{H}_7)_{12}]$ ,<sup>2</sup> and  $[\text{V}_6\text{O}_7(\text{OC}_5\text{H}_{11})_{12}]$ <sup>3</sup> were synthesized according to reported procedures.

<sup>1</sup>H NMR spectra were collected at 400 MHz on a Bruker DPX-400 instrument at 9.4 T while locked on to deuterated solvent. CD<sub>3</sub>CN was purchased from Cambridge Isotope Labs, degassed by three freeze-pump-thaw cycles, and stored over 3 Å molecular sieves prior to use. Single crystals of  $[\text{nBu}_4\text{N}]_2[\text{V}_6\text{O}_7(\text{OC}_3\text{H}_7)_{12}]$  and  $[\text{Li}(\text{pc})]_2[\text{V}_6\text{O}_7(\text{OC}_3\text{H}_7)_{12}]$  were mounted on the tip of a thin glass optical fiber (goniometer head) and mounted on a XtaLab Synergy-S Dualflex diffractometer equipped with a HyPix-6000HE HPC area detector for data collection at 100.00(10) K, respectively. The structures were solved using SHELXT-2018/2<sup>4</sup> and refined using SHELXL-2018/3.<sup>5</sup> Elemental analysis was performed on a PerkinElmer 2400 Series II analyzer, at the Elemental Analysis Facility located at the University of Rochester.

## Synthesis of POV-Alkoxide Clusters

*Synthesis of  $[\text{nBu}_4\text{N}][\text{V}_6\text{O}_7(\text{OC}_3\text{H}_7)_{12}]$  (2-propyl).* A 25 mL Parr reactor was charged with VO(OC<sub>3</sub>H<sub>7</sub>)<sub>3</sub> (300 mg, 1.23 mmol),  $[\text{nBu}_4\text{N}]\text{BH}_4$  (262 mg, 1.02 mmol), and 10 mL of *n*-propanol. The reactor was sealed and heated at 125 °C for 24 h, after which the reactor was cooled to room temperature. The maroon reaction solution was removed from the reactor and added to a round bottom flask with a stir bar and 1 mL of deionized water and was allowed to stir until the solution turned green (~1 h). The solution was dried *in vacuo*, the product was extracted with ethyl acetate, filtered, and evaporated to dryness. The green solid was brought into a drybox, where it was extracted in diethyl ether, filtered, and evaporated to dryness to produce  $[\text{nBu}_4\text{N}][\text{V}_6\text{O}_7(\text{OC}_3\text{H}_7)_{12}]$  (2-propyl) in moderate yield (110 mg, 39 %) <sup>1</sup>H NMR (400 MHz, CD<sub>3</sub>CN): δ = 26.26, 3.07, 1.59, 1.35, 0.97 ppm.

*Synthesis of  $[\text{nBu}_4\text{N}]_2[\text{V}_6\text{O}_7(\text{OR})_{12}]$  ( $R = \text{C}_3\text{H}_7, \text{C}_5\text{H}_{11}$ ).* A 48 mL pressure vessel was charged with 200 mg of neutral-charged POV-alkoxide  $[\text{V}_6\text{O}_7(\text{OR})_{12}]$  ( $R = \text{C}_3\text{H}_7, \text{C}_5\text{H}_{11}$ ), 3 molar equivalents of  $[\text{nBu}_4\text{N}]\text{BH}_4$ , a stir bar, and 20 mL MeCN. The vessel was sealed, removed from the drybox, and heated to 85 °C for 24 h with vigorous stirring. The brown-green solution was returned to the drybox, concentrated to 7 mL, and placed in a freezer at -30 °C, producing a teal green precipitate, identified as the dianionic, bis- $[\text{nBu}_4\text{N}]^+$  salt in moderate yield (*vide infra*). The low temperature conditions produced crystals suitable for single crystal X-ray diffraction analysis for  $[\text{nBu}_4\text{N}]_2[\text{V}_6\text{O}_7(\text{OC}_3\text{H}_7)_{12}]$ .

$[\text{nBu}_4\text{N}]_2[\text{V}_6\text{O}_7(\text{OC}_3\text{H}_7)_{12}]$ : yield = 97 mg, 0.060 mmol, 34 %; <sup>1</sup>H NMR (400 MHz, CD<sub>3</sub>CN): δ = 27.10, 3.07, 1.59, 1.35, 0.97, 0.74 ppm.

$[\text{nBu}_4\text{N}]_2[\text{V}_6\text{O}_7(\text{OC}_5\text{H}_{11})_{12}]$ : yield = 82 mg, 0.042 mmol, 31 %; <sup>1</sup>H NMR (400 MHz, CD<sub>3</sub>CN): δ = 26.26, 3.07, 1.59, 1.35, 0.97, 0.88 ppm.

*Synthesis of  $[Li(pc)]_2[V_6O_7(OC_3H_7)_{12}]$ .* A 20 mL scintillation vial was charged with  $[^nBu_4N]_2[V_6O_7(OC_3H_7)_{12}]$  (100 mg, 0.062 mmol) and dissolved in 2 mL propylene carbonate. Li bis-(trifluoromethanesulfonyl)imide (180 mg, 0.63 mmol, 10 equiv.) was dissolved in 6 mL diethyl ether in a separate vial. The Li salt solution was added to the cluster solution, after which 6 mL of toluene and 4 mL of pentane were added. The cloudy solution was placed in a -30 °C freezer for 2 days, after which time crystals suitable for single crystal X-ray diffraction analysis were observed, and the compound was isolated in moderate yield (45.3 mg, 0.034 mmol, 54%). Crystals were crushed and dried for 48 h for elemental analysis. Elemental analysis for  $C_{44}H_{96}O_{25}Li_2V_6$  (MW: 964.17 g/mol) Calc'd (%): C, 39.3; H, 7.2; Found (%): C, 39.522; H, 7.023; N, 0.053.

**Electrochemistry.** Electrochemical measurements were carried out using a Bio-Logic SP 150 potentiostat/galvanostat and the EC-Lab software suite. A 3 mm Glassy carbon disc electrode was used as the working electrode; a Pt wire was used as the counter electrode, and the reference electrode was a non-aqueous Ag/AgNO<sub>3</sub> cell filled with 1 mM silver nitrate (AgNO<sub>3</sub>) in 0.1 M  $[^nBu_4N]PF_6$  (BAS Inc). Cyclic voltammograms (CV) were measured at 100 mV s<sup>-1</sup> with IR compensation accounted for by measuring the uncompensated resistance with a 100 kHz impedance measurement and correcting for 85% of the expected drop using the ZIR tool in the EC-Lab suite. Square wave voltammograms (SWV) were measured with a pulse height of 25 mV, a pulse width of 100 ms, and a step height of 10 mV.

**Procedure for Metal Triflate Titration Experiments.** An analyte solution consisting of 0.1 M  $[^nBu_4N]OTf$  and 1 mM of selected cluster in 5 mL of MeCN or propylene carbonate was charged in an electrochemical cell. The second solution contained 10 mM MOTf (M = Li, Na, K) in 10 mL of MeCN or propylene carbonate. CV and SWV were recorded of the analyte solution prior to titration. Alkali salt solution was added to the cell to achieve specified MOTf : POV-alkoxide ratios and was allowed to stir for 10 s before a CV and SWV were taken. The process was repeated until 5 molar equivalents of MOTf was reached. After this point, where applicable, solid samples of MOTf salts were measured and added as a solid to access solutions with excess alkali salt (10-100 molar equivalents of MOTf versus POV-alkoxide).

**Procedure for Cation Selectivity Studies.** An electrochemical cell was charged with a solution containing 0.1 M MOTf (M = Na, K) and 1 mM of **1-methyl** or **3-pentyl** in MeCN and a stir bar. An initial CV and SWV were recorded of the cluster solution. A separate solution containing 10 mM LiOTf in 10 mL of MeCN and was added to the cluster solution in specified increments, stirring for 10 s before recording CV and SWV. The process was repeated until 5 molar equivalents of LiOTf (versus POV-alkoxide) was added.

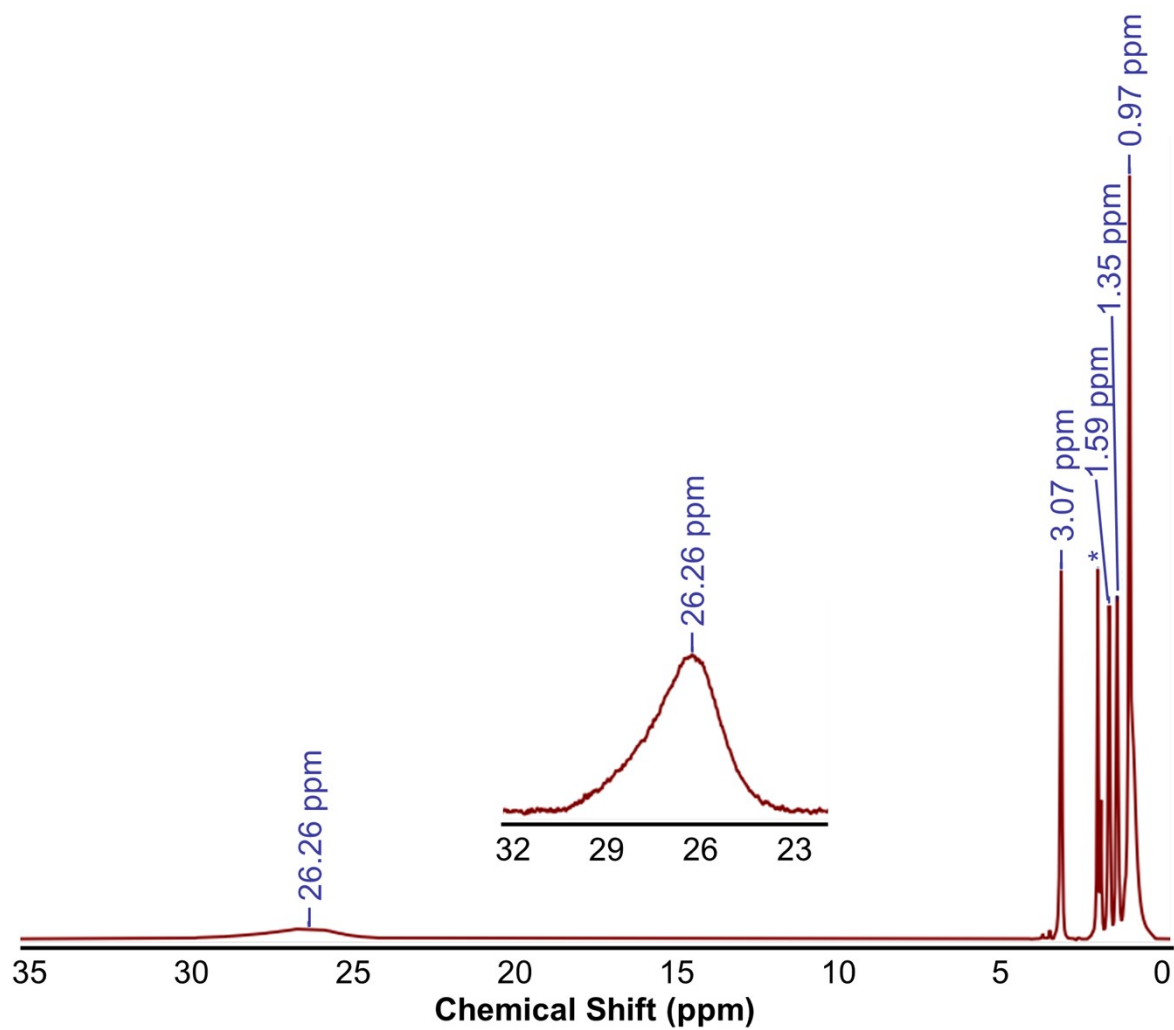

Figure S1.  $^1\text{H}$  NMR of 2-propyl in  $\text{MeCN-d}_3$  at  $21^\circ\text{C}$ .

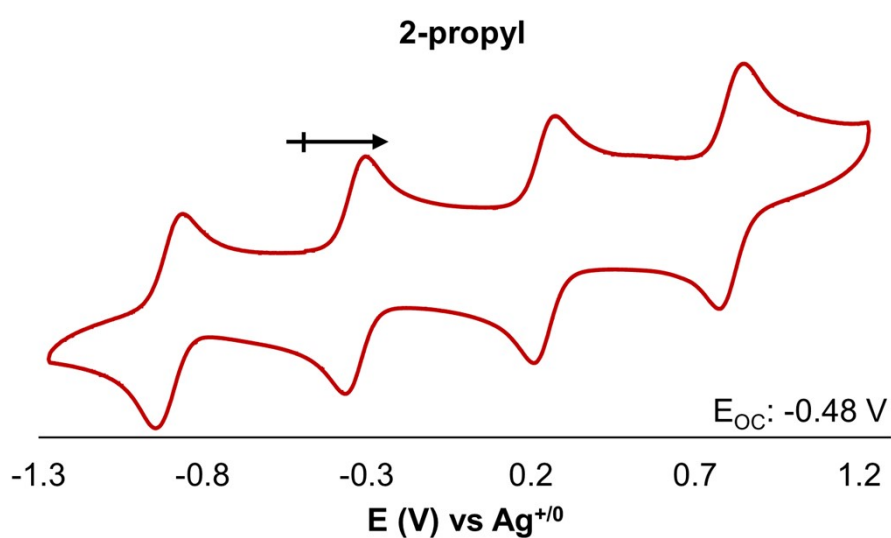

Figure S2. CV of a 0.5 mM solution of 2-propyl at  $100 \text{ mVs}^{-1}$  in  $\text{MeCN}$  with  $0.1 \text{ M } [\text{nBu}_4\text{N}]\text{OTf}$  electrolyte.

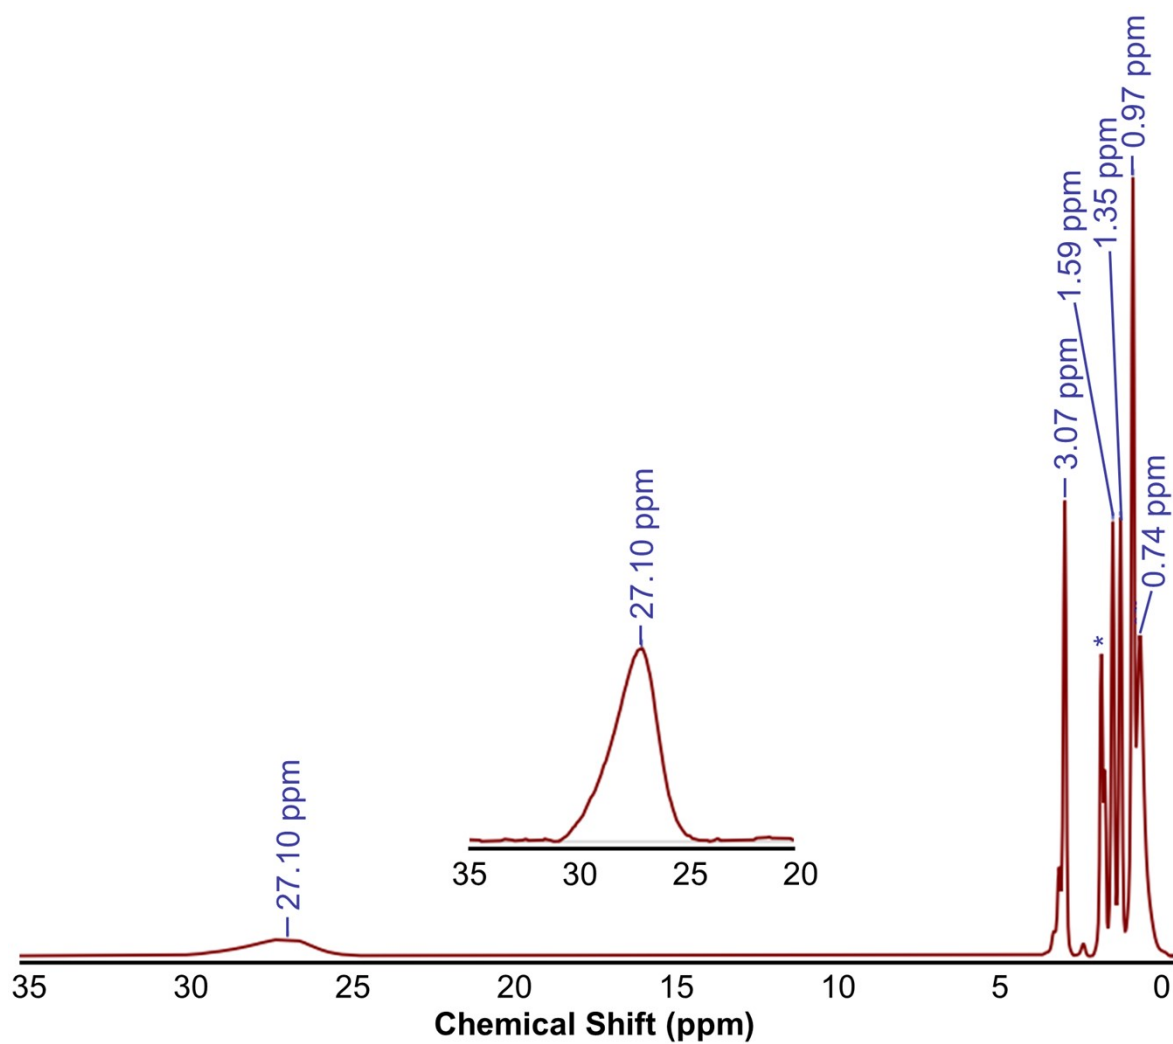

**Figure S3.**  $^1\text{H}$  NMR of  $[\text{nBu}_4\text{N}]_2[\text{V}_6\text{O}_7(\text{OC}_3\text{H}_7)_{12}]$  in  $\text{MeCN-d}_3$  at  $21^\circ\text{C}$ .

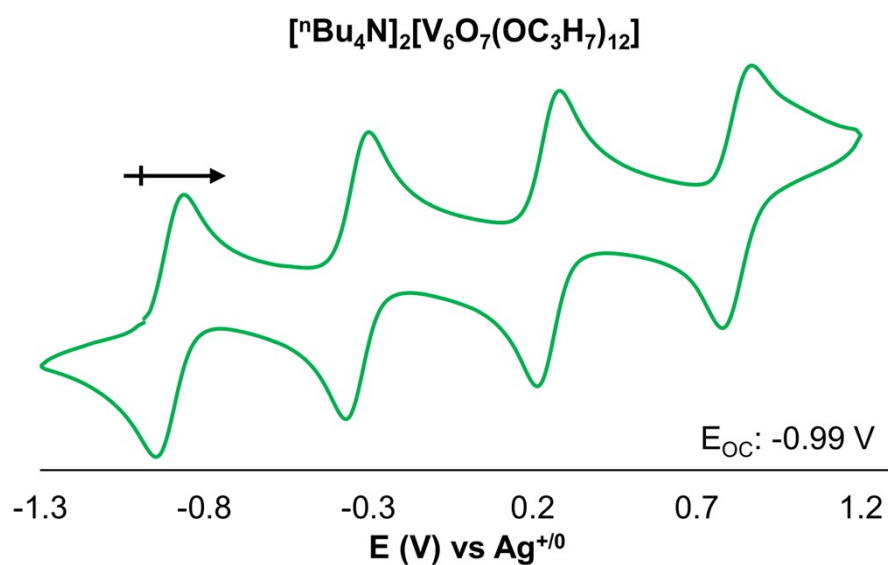

**Figure S4.** CV of a 1 mM solution of  $[\text{nBu}_4\text{N}]_2[\text{V}_6\text{O}_7(\text{OC}_3\text{H}_7)_{12}]$  at  $100 \text{ mVs}^{-1}$  in  $\text{MeCN}$  with 0.1 M  $[\text{nBu}_4\text{N}]\text{OTf}$  electrolyte.

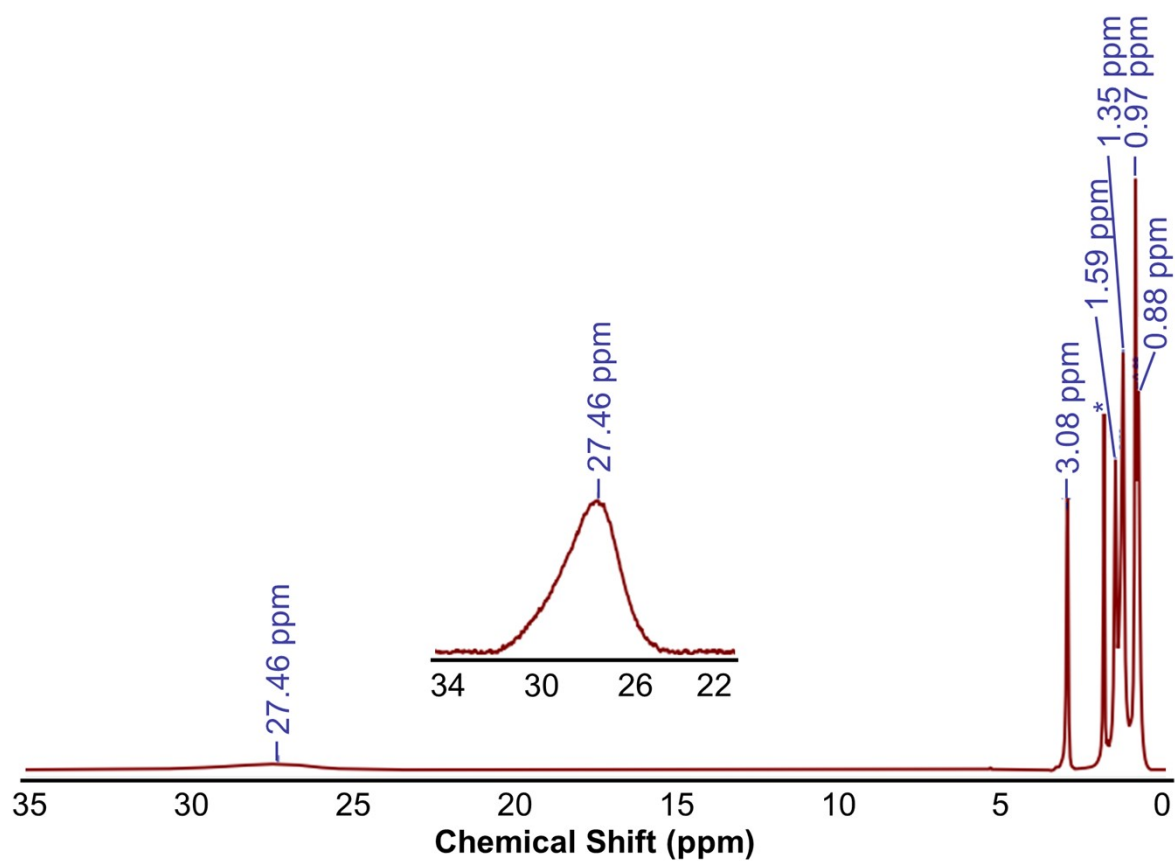

**Figure S5.**  $^1\text{H}$  NMR of  $[\text{nBu}_4\text{N}]_2[\text{V}_6\text{O}_7(\text{OC}_5\text{H}_{11})_{12}]$  in  $\text{MeCN-d}_3$  at  $21^\circ\text{C}$ .

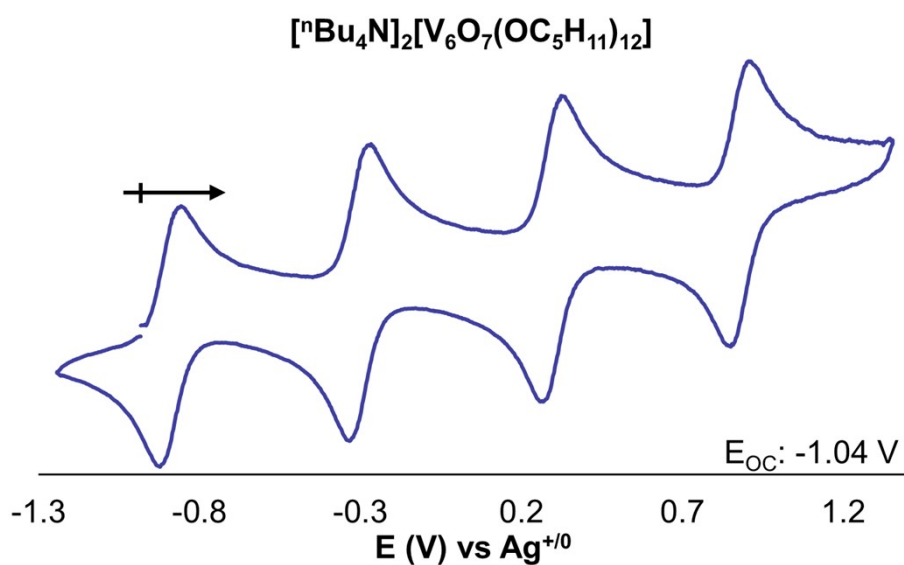

**Figure S6.** CV of a 1 mM solution of  $[\text{nBu}_4\text{N}]_2[\text{V}_6\text{O}_7(\text{OC}_5\text{H}_{11})_{12}]$  at  $100 \text{ mVs}^{-1}$  in  $\text{MeCN}$  with 0.1 M  $[\text{nBu}_4\text{N}]\text{OTf}$  electrolyte.

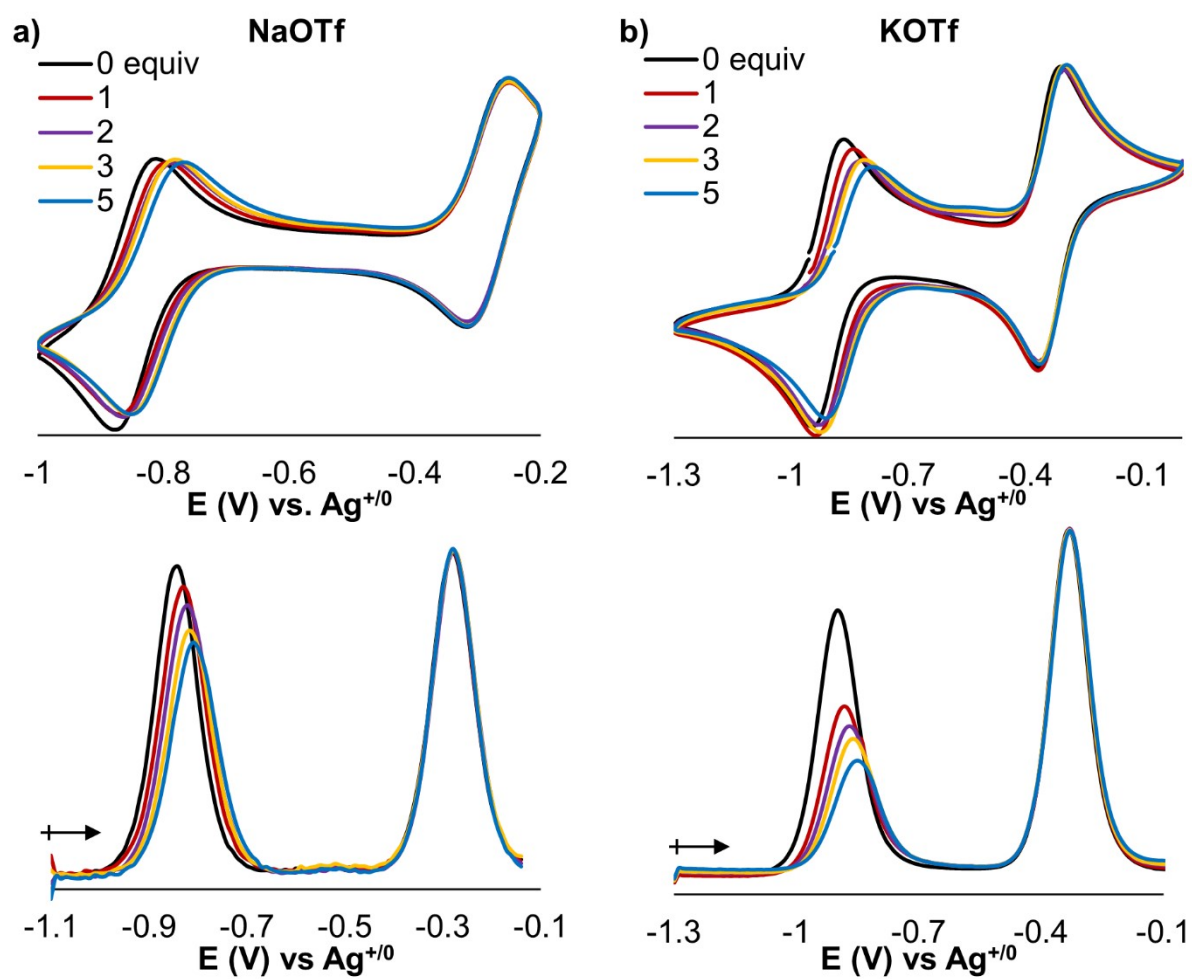

**Figure S7.** CV and SWV data for a) NaOTf and b) KOTf titration experiments for **2-propyl** in MeCN with 0.1 M  $[n\text{Bu}_4\text{N}]\text{OTf}$  electrolyte.

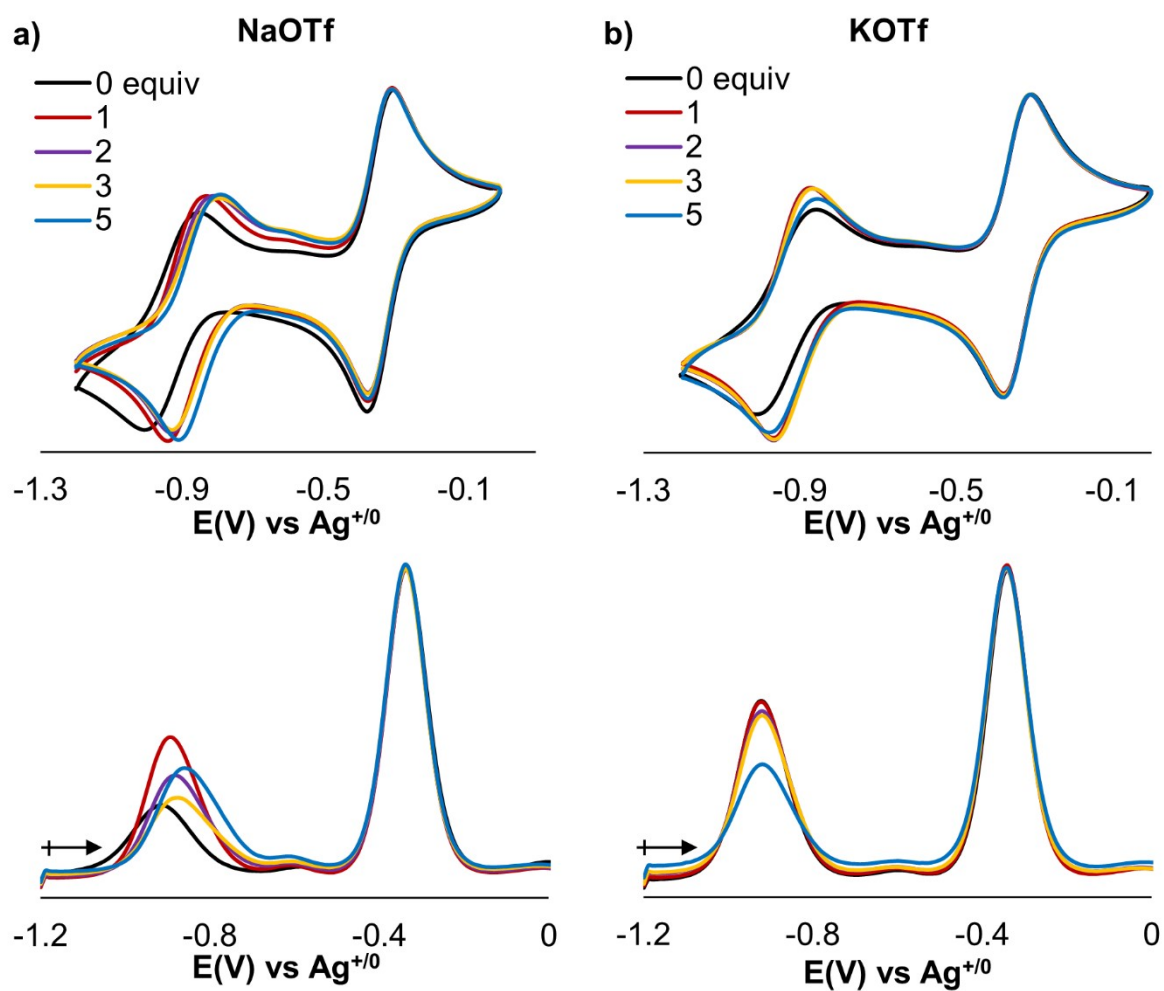

**Figure S8.** CV and SWV data for a) NaOTf and b) KOTf titration experiments for **3-pentyl** in MeCN with 0.1 M  $[nBu_4N]OTf$  electrolyte.



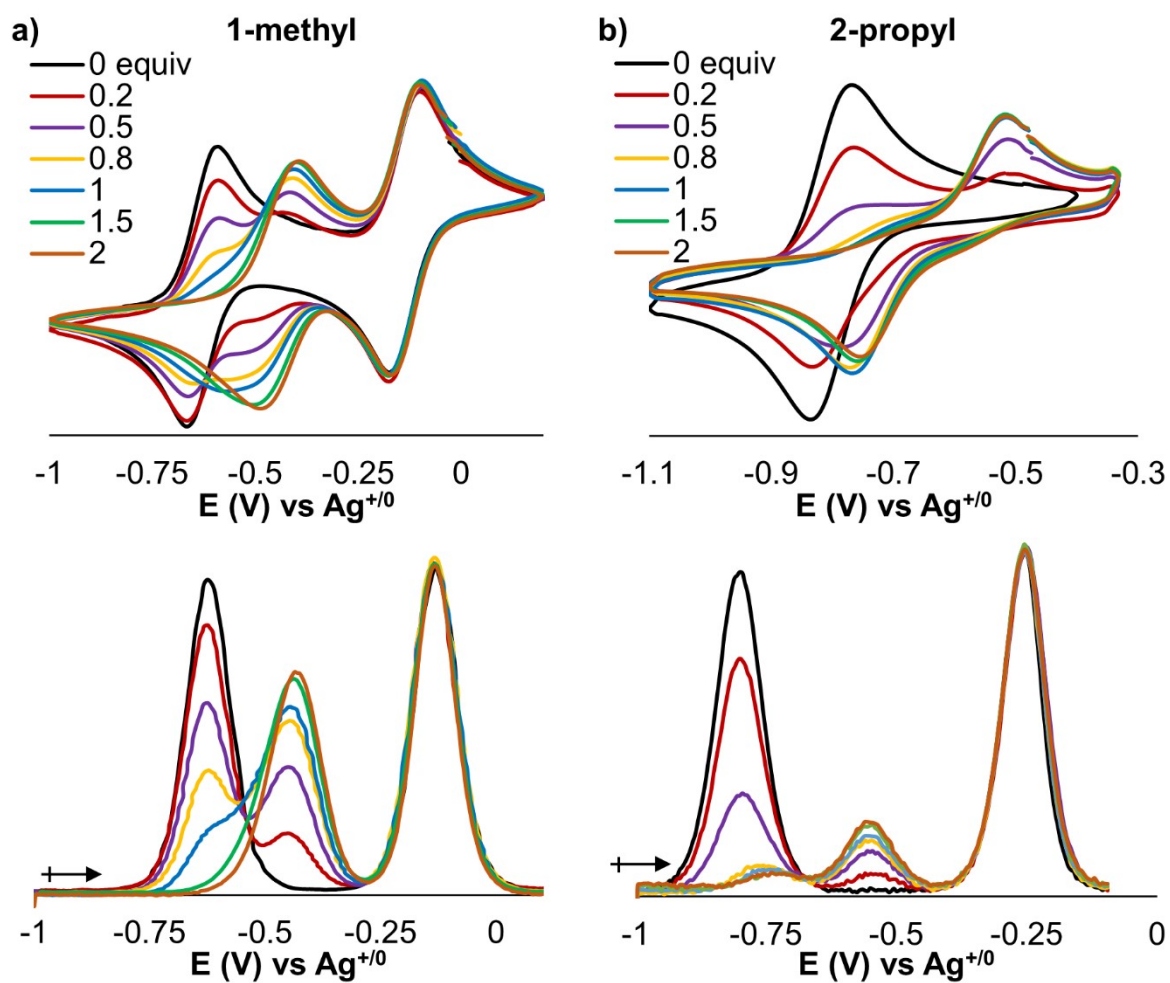

**Figure S9.** CV and SWV data for LiOTf titration experiments for a) **1-methyl** and b) **2-propyl** in propylene carbonate with 0.1 M [ $n$ Bu<sub>4</sub>N]OTf electrolyte.

**Table S1.** Crystallographic parameters for  $[\text{Li}(\text{pc})]_2[\text{V}_6\text{O}_7(\text{OC}_3\text{H}_7)_{12}]$  and  $[\text{nBu}_4\text{N}]_2[\text{V}_6\text{O}_7(\text{OC}_3\text{H}_7)_{12}](\text{CH}_3\text{CN})_4$ .

| Compound                          | $[\text{Li}(\text{pc})]_2[\text{V}_6\text{O}_7(\text{OC}_3\text{H}_7)_{12}]$                             | $[\text{nBu}_4\text{N}]_2[\text{V}_6\text{O}_7(\text{OC}_3\text{H}_7)_{12}](\text{CH}_3\text{CN})_4$ |
|-----------------------------------|----------------------------------------------------------------------------------------------------------|------------------------------------------------------------------------------------------------------|
| CCDC                              | 2145391                                                                                                  | 2145392                                                                                              |
| Empirical Formula                 | $\text{C}_{44}\text{H}_{96}\text{Li}_2\text{O}_{25}\text{V}_6$                                           | $\text{C}_{76}\text{H}_{168}\text{N}_6\text{O}_{19}\text{V}_6$                                       |
| Formula weight                    | 1344.72                                                                                                  | 1775.79                                                                                              |
| Temperature/ K                    | 100.00(10) K                                                                                             | 100.00(10) K                                                                                         |
| Wavelength/ Å                     | 1.54184 Å                                                                                                | 1.54184 Å                                                                                            |
| Crystal system                    | monoclinic                                                                                               | monoclinic                                                                                           |
| Space group                       | C2/c                                                                                                     | P2 <sub>1</sub> /n                                                                                   |
| Unit Cell Dimensions              | a = 17.82370(10) Å<br>b = 17.66670(10) Å<br>c = 20.11890(10) Å<br>α = 90°<br>β = 91.2190(10)°<br>γ = 90° | a = 13.85530(10) Å<br>b = 18.3708(2) Å<br>c = 18.6840(2) Å<br>α = 90°<br>β = 93.6200(10)°<br>γ = 90° |
| Volume/ Å <sup>3</sup>            | 6333.73(6) Å <sup>3</sup>                                                                                | 4746.20(8) Å <sup>3</sup>                                                                            |
| Z                                 | 4                                                                                                        | 2                                                                                                    |
| Reflections collected             | 54852                                                                                                    | 60860                                                                                                |
| Independent reflections           | 6854 [R(int) = 0.0297]                                                                                   | 10232 [R(int) = 0.0513]                                                                              |
| Completeness to theta<br>=74.504° | 99.9 %                                                                                                   | 99.9 %                                                                                               |
| Goodness-of-fit of F2             | 1.146                                                                                                    | 1.086                                                                                                |
| Final R indices<br>[I>2σ(I)]      | R1 = 0.0277, wR2 = 0.0768                                                                                | R1 = 0.0367, wR2 = 0.0988                                                                            |
| Largest diff. peak and hole       | 0.419 and -0.440 Å <sup>-3</sup>                                                                         | 0.468 and -0.596 Å <sup>-3</sup>                                                                     |

## References

1. J. Spandl, C. Daniel, I. Brudgam and H. Hartl, *Angew Chem Int Ed Engl*, 2003, **42**, 1163-1166.
2. A. M. Kosswattaarachchi, L. E. VanGelder, O. Nachtigall, J. P. Hazelnis, W. W. Brennessel, E. M. Matson and T. R. Cook, *J Electrochem Soc*, 2019, **166**, A464-A472.
3. L. E. VanGelder, E. Schreiber and E. M. Matson, *J Mater Chem A*, 2019, **7**, 4893-4902.
4. G. M. Sheldrick, *Acta Crystallogr A Found Adv*, 2015, **71**, 3-8.
5. G. Sheldrick, *Acta Crystallographica Section C*, 2015, **71**, 3-8.
